# Supplementary material
Source: Springer Nature journal article supplement (https://www.springermedizin.de/resource/supplementary/12891_2014_2230_MOESM2_ESM.pdf/9509738)

### EWCS 1995, n = 15579

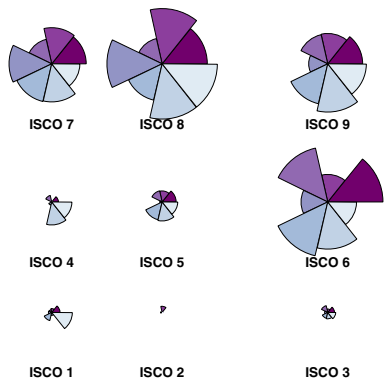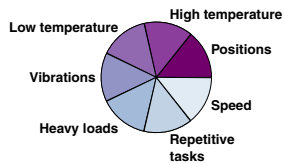

### EWCS 2000, n = 21251

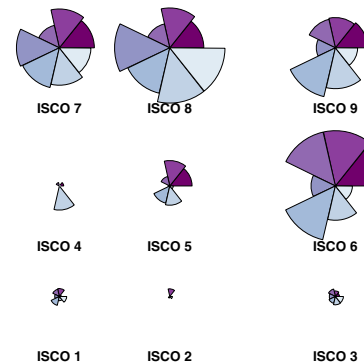

### EWCS 2005, n = 14540

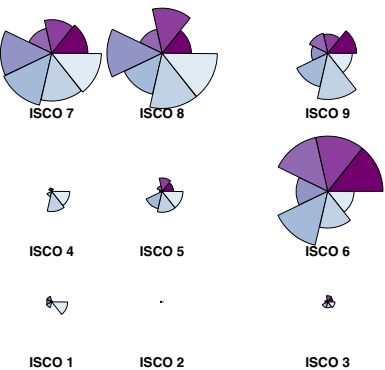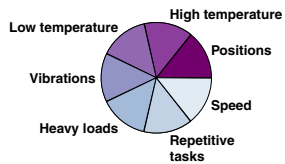

### EWCS 2010, n = 20747

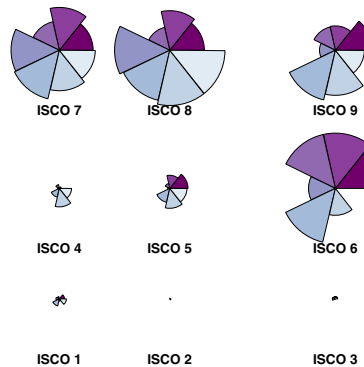

Supplement: MOESM2 [file 9509738]
